# Supplementary material for: Targeted plasma metabolomics combined with machine learning for the diagnosis of severe acute respiratory syndrome virus type 2
Source: PubMed Central journal article supplement (PMC10092816; doi:10.3389/fmicb.2022.1059289), 2023-03-29
Supplement: Data_Sheet_1.pdf [file Data_Sheet_1.pdf]

**Supplementary Material for:**

Targeted plasma metabolomics combined with machine learning for the diagnosis of acute SARS-CoV-2

Le AT<sup>1</sup>, Wu M<sup>2</sup>, Khan A<sup>3</sup>, Philips N<sup>4</sup>, Rajpurkar PS<sup>4,†</sup>, Garland M<sup>1</sup>, Magid K<sup>1</sup>, Sibai M<sup>1</sup>, Huang C<sup>1</sup>, Sahoo MK<sup>1</sup>, Mak J<sup>5</sup>, Bowen R<sup>1,6</sup>, Cowan T<sup>1,5</sup>, Pinsky BA<sup>1,7,8</sup>, Hogan CA<sup>1,3,7,9\*</sup>

<sup>1</sup>Department of Pathology, Stanford University School of Medicine, Stanford, CA, USA

<sup>2</sup>Department of Anesthesiology, Stanford University School of Medicine, Stanford, CA, USA

<sup>3</sup>British Columbia Centre for Disease Control Public Health Laboratory, Vancouver, BC, Canada

<sup>4</sup>Stanford Computer Science Department, Stanford University, Stanford, CA

<sup>5</sup>Stanford Biochemical Genetics Laboratory, Stanford Health Care, Palo Alto, CA, USA

<sup>6</sup>Clinical Chemistry and Immunology Laboratory, Stanford Health Care, Palo Alto, CA, USA

<sup>7</sup>Clinical Virology Laboratory, Stanford Health Care, Palo Alto, CA, USA

<sup>8</sup>Division of Infectious Diseases and Geographic Medicine, Department of Medicine, Stanford University School of Medicine, Stanford, CA, USA

<sup>9</sup>University of British Columbia, Vancouver, BC, Canada

\* Address correspondence to Catherine A. Hogan, [catherine.hogan@bccdc.ca](mailto:catherine.hogan@bccdc.ca)

† Current affiliation: Department of Biomedical Informatics, Harvard Medical School, Boston, MA, USA

Table of contents

***Supplemental Table 1*** ..... **3**  
***Supplemental Table 2*** ..... **4**  
***Supplemental Figure 1***..... **5**  
***Supplemental Figure 2***..... **7**  
***Supplemental Figure 3***..... **9**

**Supplemental Table 1.** Multivariable linear regression model for SARS-CoV-2 status prediction adjusted for age, sex, and machine learning output. Model output was observed to be the most significant feature associated with infection status prediction.

|                   | <b>Coefficient</b> | <b>Standard error</b> | <b>P-value</b> | <b>95% CI</b>  |
|-------------------|--------------------|-----------------------|----------------|----------------|
| Age               | 0.0010             | 0.008                 | 0.9            | -0.0015, 0.017 |
| Sex               | -0.7566            | 0.340                 | 0.03           | -1.424, -0.089 |
| LGMB model output | -1.45              | 0.354                 | <0.001         | -2.148, -0.761 |

CI: confidence interval; LGMB: Light gradient boosted model

**Supplemental Table 2.** Median concentrations of the top 20 amino acids in COVID-19 positive and negative samples

| Compound**             | Median concentration (IQR) |          | Positive:<br>negative ratio | p-<br>value* |
|------------------------|----------------------------|----------|-----------------------------|--------------|
|                        | Positive                   | Negative |                             |              |
| Arginine               | 33                         | 87       | 0.38                        | 1.6e-13      |
| Aspartic acid          | 14                         | 11       | 1.27                        | 0.2          |
| 3-Methylhistidine      | 3                          | 7        | 0.43                        | 2.0e-11      |
| Creatinine             | 58                         | 91       | 0.64                        | 4.7e-09      |
| Ornithine              | 107                        | 110      | 0.97                        | 0.6          |
| Sulfocysteine          | 5                          | 3        | 1.67                        | 1.2e-09      |
| 3-Aminoisobutyric acid | 3                          | 4        | 0.75                        | 5.4e-07      |
| Hydroxyproline         | 8                          | 15       | 0.53                        | 2.4e-08      |
| Glutamine              | 391                        | 439      | 0.89                        | 0.03         |
| Valine                 | 240                        | 345      | 0.70                        | 2.2e-09      |
| 2-Aminoadipic acid     | 1                          | 1        | 1                           | 0.8          |
| Taurine                | 131                        | 93       | 1.41                        | 0.009        |
| Tryptophan             | 35                         | 46       | 0.76                        | 4.1e-06      |
| Cystine                | 24                         | 21       | 1.14                        | 0.3          |
| Histidine              | 66                         | 86       | 0.77                        | 6.4e-08      |
| Homocitrulline         | 0                          | 0        | 0                           | NA           |
| Citrulline             | 21                         | 26       | 0.81                        | 0.01         |
| Lysine                 | 165                        | 244      | 0.68                        | 2.9e-08      |
| Methionine             | 20                         | 33       | 0.61                        | 4.8e-08      |
| Proline                | 151                        | 250      | 0.60                        | 1.2e-07      |

\*Mann-Whitney *U* test

Concentration of compounds is listed in  $\mu\text{M}$  with the exception of pyroglutamic acid, which is listed in peak area abundance.

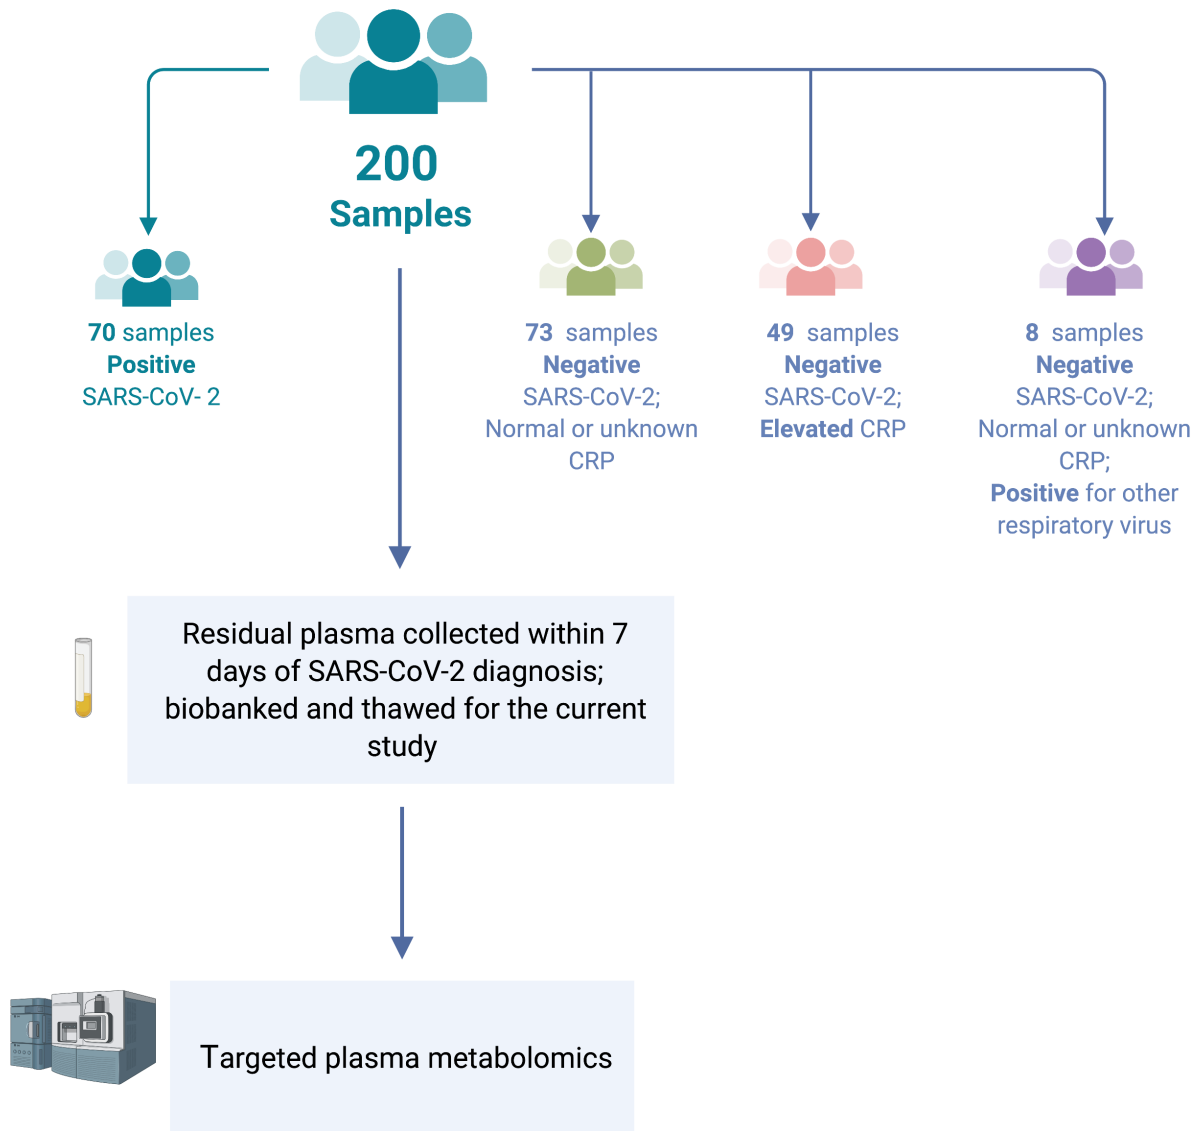

**Supplemental Figure 1.** Flowchart of the specimen selection for assessment of the plasma targeted amino acid method.

SARS-CoV-2: severe acute respiratory syndrome type

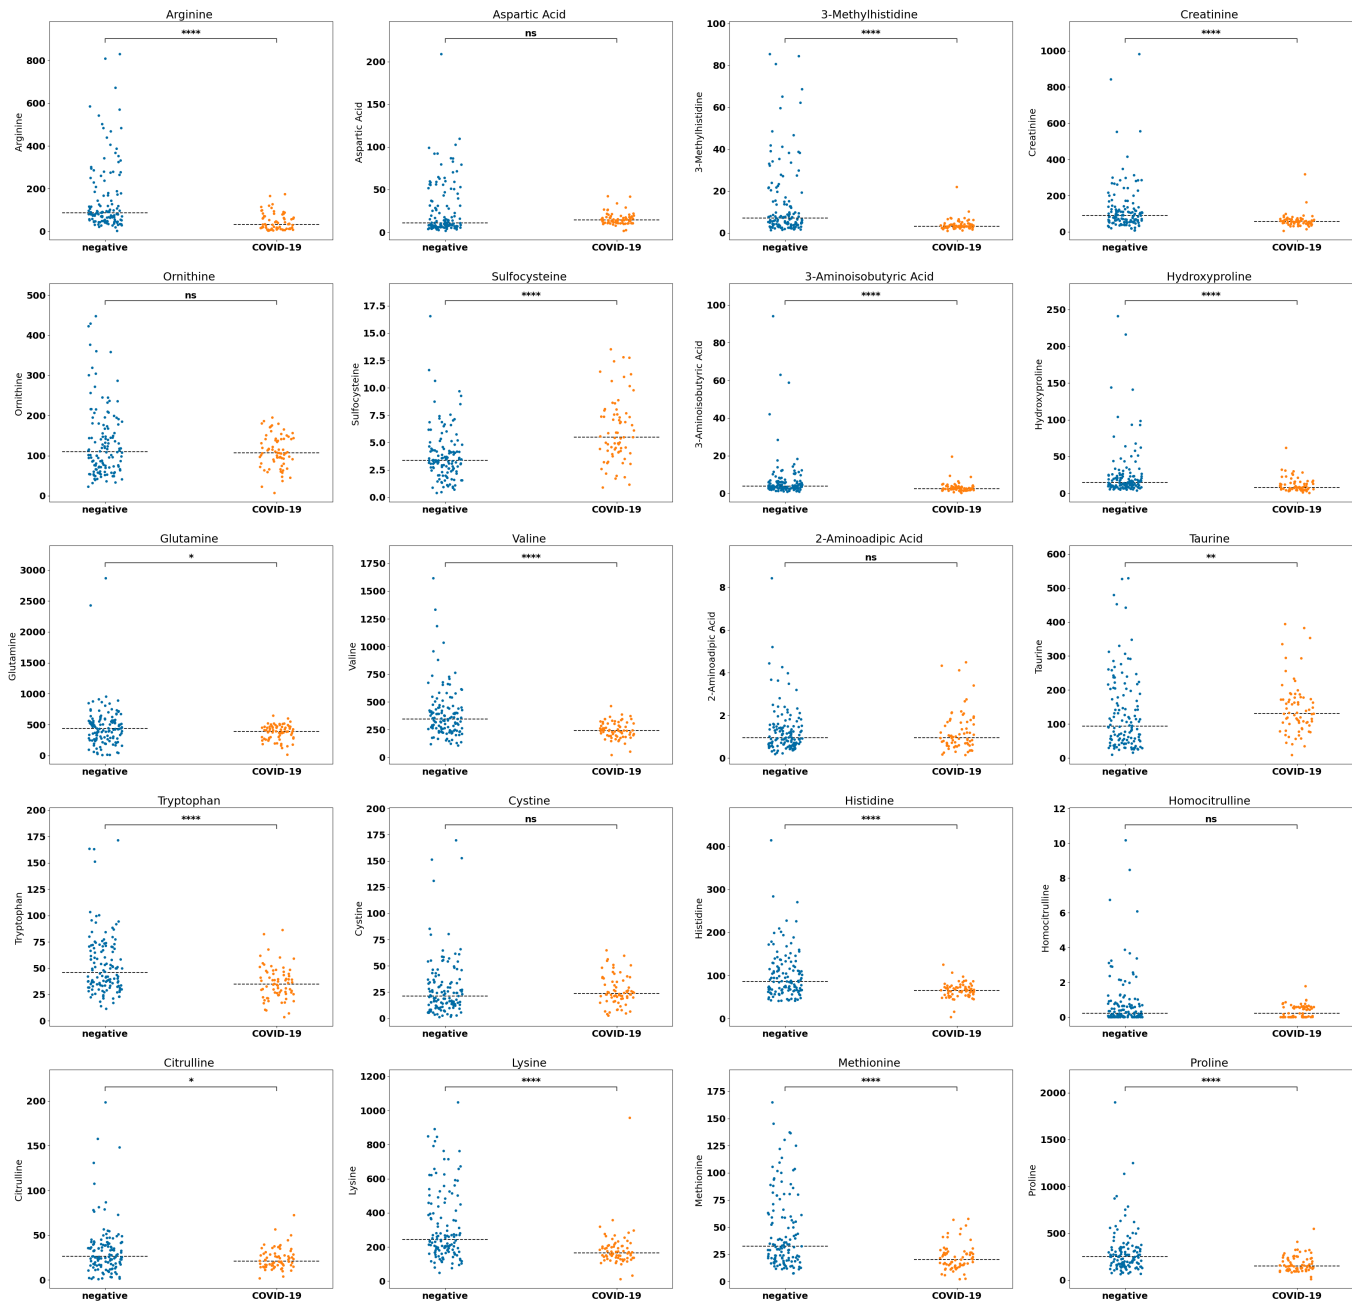

**Supplemental Figure 2.** Amino acid concentration by LC/MS-MS standard curve analysis in SARS-CoV-2-positive vs negative specimens for the top 20 differentiating amino acids

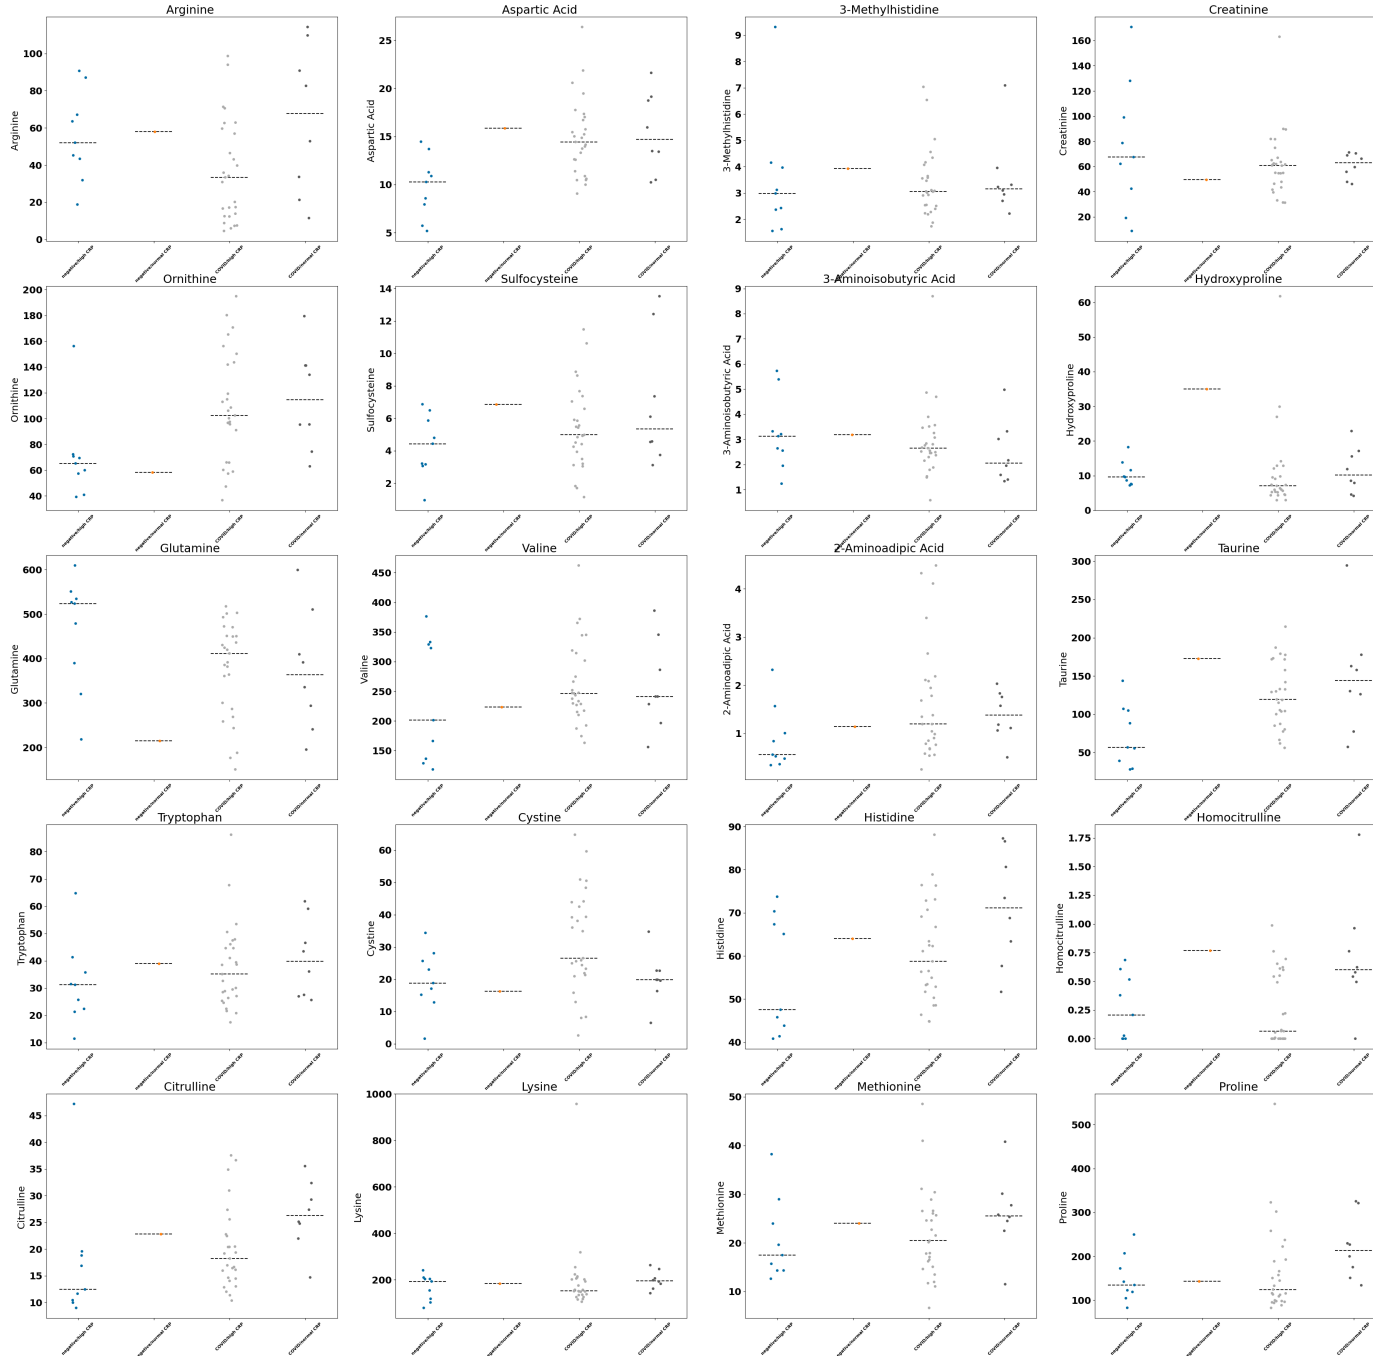



**Supplemental Figure 3.** Amino acid concentration by LC/MS-MS standard curve analysis in SARS-CoV-2-positive vs negative specimens for the top 20 differentiating amino acids, stratified by C-reactive protein status. The x-axis categories are listed in the following left to right order: Negative/high CRP, Negative/normal CRP, COVID/high CRP, COVID/normal CRP.

CRP: C-reactive protein
